# Supplementary material
Source: Springer Nature journal article supplement (https://www.springermedizin.de/resource/supplementary/12958_2010_731_MOESM1_ESM.pdf/9568350)
Supplement: MOESM1 [file 9568350]

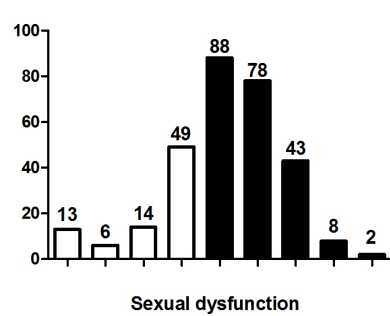

Sexual dysfunction

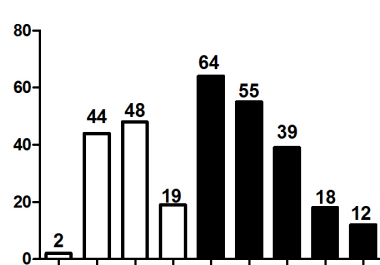

Avoidance

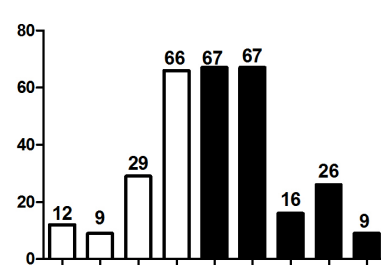

Non-sensuality

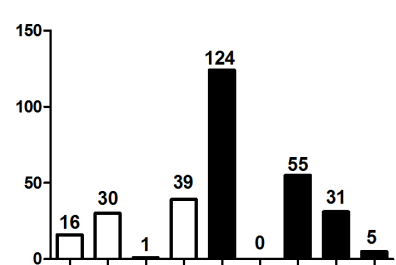

Infrequency

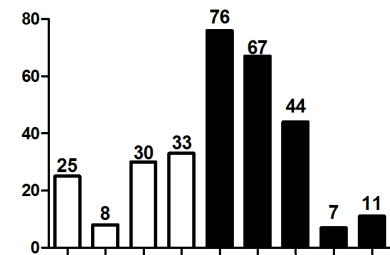

Vaginismus

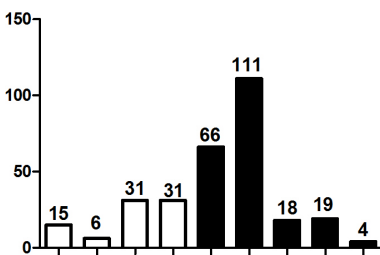

Anorgasmia

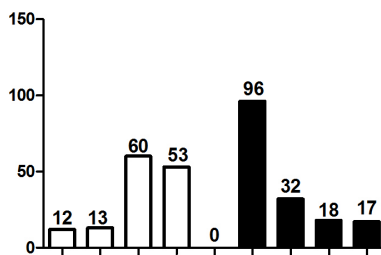

Non-communication

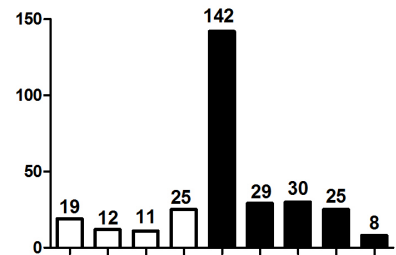

Dissatisfaction
